# Supplementary material for: Linear and nonlinear optical properties of boron phosphide nanotubes: insights into third-harmonic generation and magneto-optical tunability
Source: Royal Society of Chemistry journal article supplement (doi:10.1039/d5ra06145h), 2025-01-01
Supplement: d5ra06145h1.pdf [file d5ra06145h1.pdf]

## **Supporting File**

# **Linear and Nonlinear Optical Properties of Boron Phosphide Nanotubes: Insights into Third-Harmonic Generation and Magneto-Optical Tunability**

**Raad Chegel<sup>\*1</sup>**

<sup>1</sup>Department of physics, Faculty of Science, Razi University, Kermanshah, Iran

---

<sup>1</sup> Email address: Raad.Chegel@gmail.com

### DFT calculations:

We performed density functional theory (DFT) simulations using the Spanish Initiative for Electronic Simulations with Thousands of Atoms (SIESTA) package [1]. For the exchange-correlation term, we implemented the Perdew-Burke-Ernzerhof (PBE) functional within the generalized gradient approximation (GGA). A double- $\zeta$  plus polarization (DZP) atomic orbital basis set was employed with a plane-wave energy cutoff of 500 Ry. All atomic positions were fully relaxed until the residual force on each atom was less than 0.02 eV/Å. To prevent artificial interlayer interactions, a vacuum spacing of 20 Å was applied along the out-of-plane direction. The Brillouin zone was sampled using a  $15 \times 15 \times 1$  Monkhorst-Pack k-point grid to ensure convergence. The resulting optimized lattice constant for h-BP is 3.18 Å, which is in excellent agreement with previous DFT reports [2].

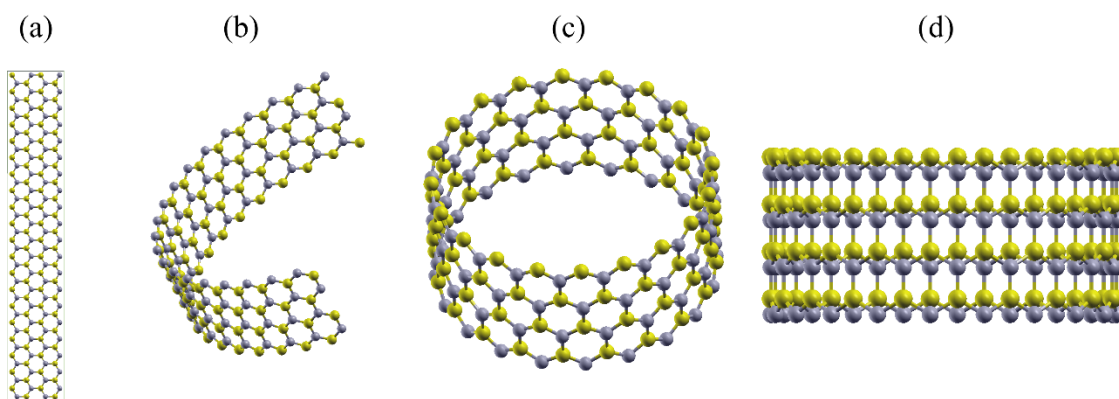

**Figure S1.** (a) Zigzag BP nanoribbon. (b)–(c) Rolling process of the nanoribbon leading to the formation of a zigzag BP nanotube. (d) The resulting unit cell of the zigzag BPNT, highlighting the arrangement of B and P atoms along the tube axis and demonstrating the structural periodicity in the rolled-up configuration.

### Finding the required tight binding parameters for h-BP:

Constructing the tight-binding (TB) Hamiltonian requires determining key parameters, namely the nearest-neighbor hopping integrals and the on-site atomic energies for each atom in the unit cell. For h-BP, we extracted these TB parameters by fitting the TB band structure to results from DFT. To achieve a high degree of accuracy and quantitative agreement, our model was extended to include interactions up to the fifth nearest-neighbor. This approach yields excellent agreement between the TB and DFT band structures for h-BP, as shown in Figure A1, with strong correlation for both the valence and conduction bands across the entire first Brillouin zone.

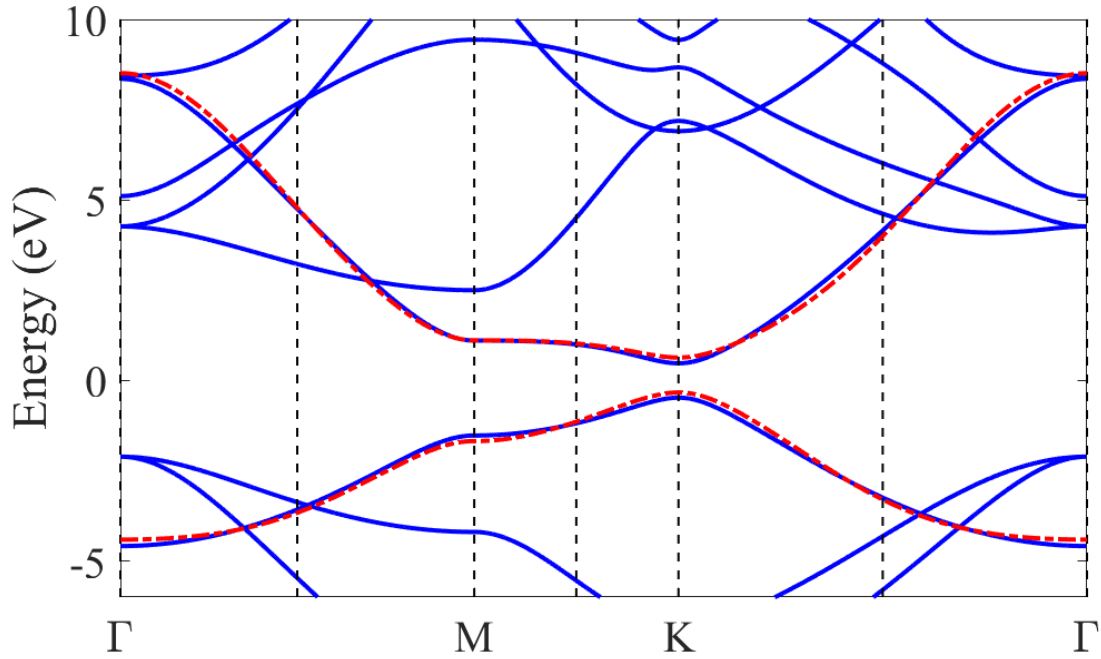

**Figure S2.** Band structure of monolayer h-BP calculated using the 5NN- tight binding model (red lines) and DFT (blue lines). The tight-binding results exhibit excellent agreement with DFT, especially in the vicinity of the K-point. Both approaches reveal parabolic dispersion of the valence and conduction bands near the K-point and confirm the presence of a direct semiconductor band gap at this high-symmetry point.

### Zone-Folding Formalism for BASNTs in the presence of the magnetic field

The electronic structure of BPNTs is derived from that of the monolayer h-BP using the well-established zone-folding approximation [3]. This method imposes periodic boundary conditions on the 2D wave vector, effectively quantizing its component along the nanotube's circumference  $[\vec{K}_2]$  while preserving its continuous nature along the tube axis  $[\vec{K}_1]$ . So, the nanotube's wave vector can then be expressed in terms of reciprocal vectors as [3, 4]:

$$k = \mu \vec{K}_1 + k_z \frac{\vec{K}_2}{|\vec{K}_2|} \quad \mu = 1, \dots, N \quad \frac{-\pi}{T} < k_z < \frac{\pi}{T}$$

Here,  $\mu$  is the discrete subband index,  $N$  denotes the number of hexagonal units within the nanotube's translational unit cell,  $k_z$  is the continuous axial wave vector and  $T$  is the translational period. By substituting this quantized wave vector into the monolayer's dispersion relation, we obtain the 1D subband energy structure for the BPNTs as:

$$E_{BPNT}^{(l)}(k_z, \mu) = E_{h-BP}^{(l)}(\mu \vec{K}_1 + k_z \frac{\vec{K}_2}{|\vec{K}_2|})$$

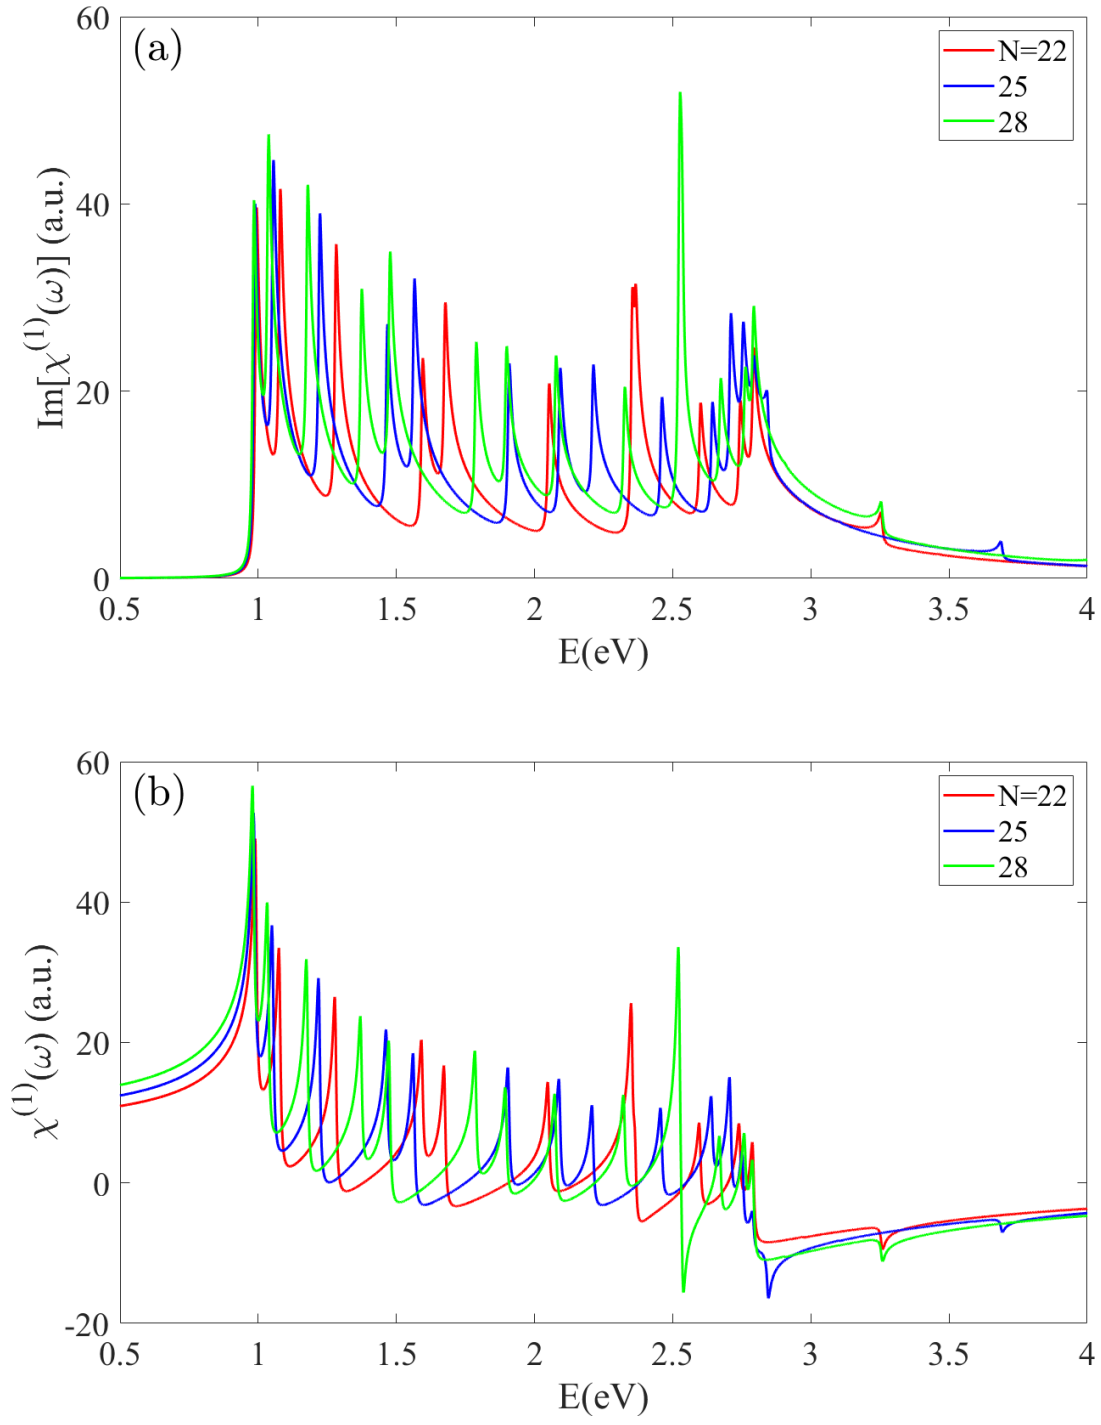

**Figure A3.** The (a) imaginary and (b) part of the linear optical susceptibility for zigzag BPNTs with S1 family.

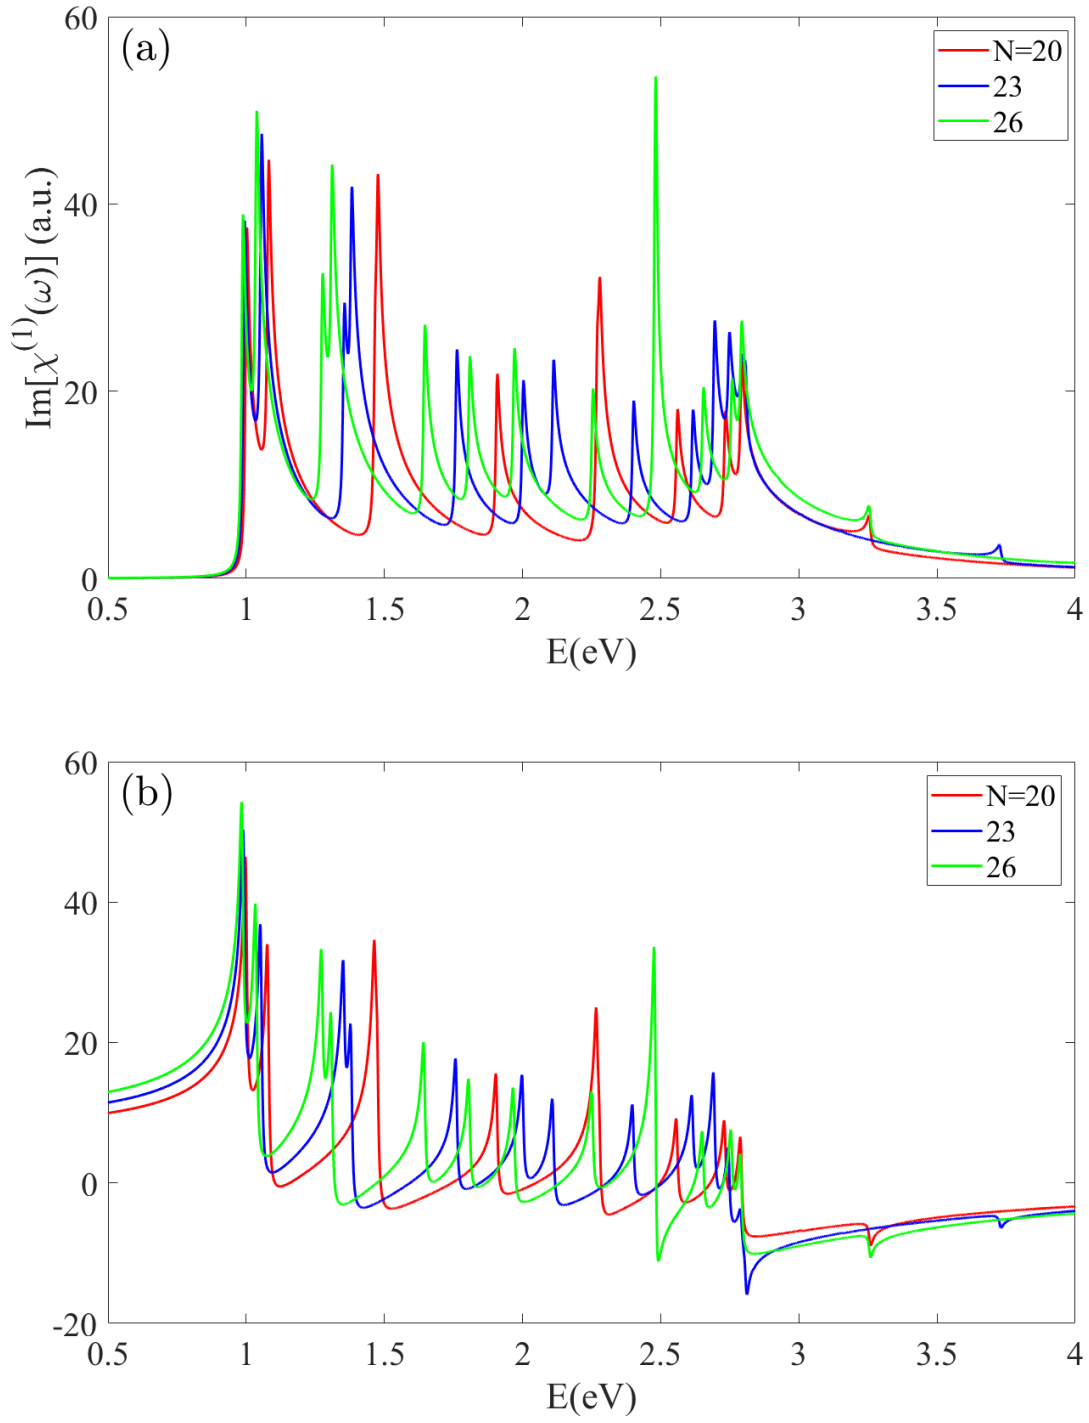

**Figure A4.** The (a) imaginary and (b) part of the linear optical susceptibility for zigzag BPNTs with S2 family.

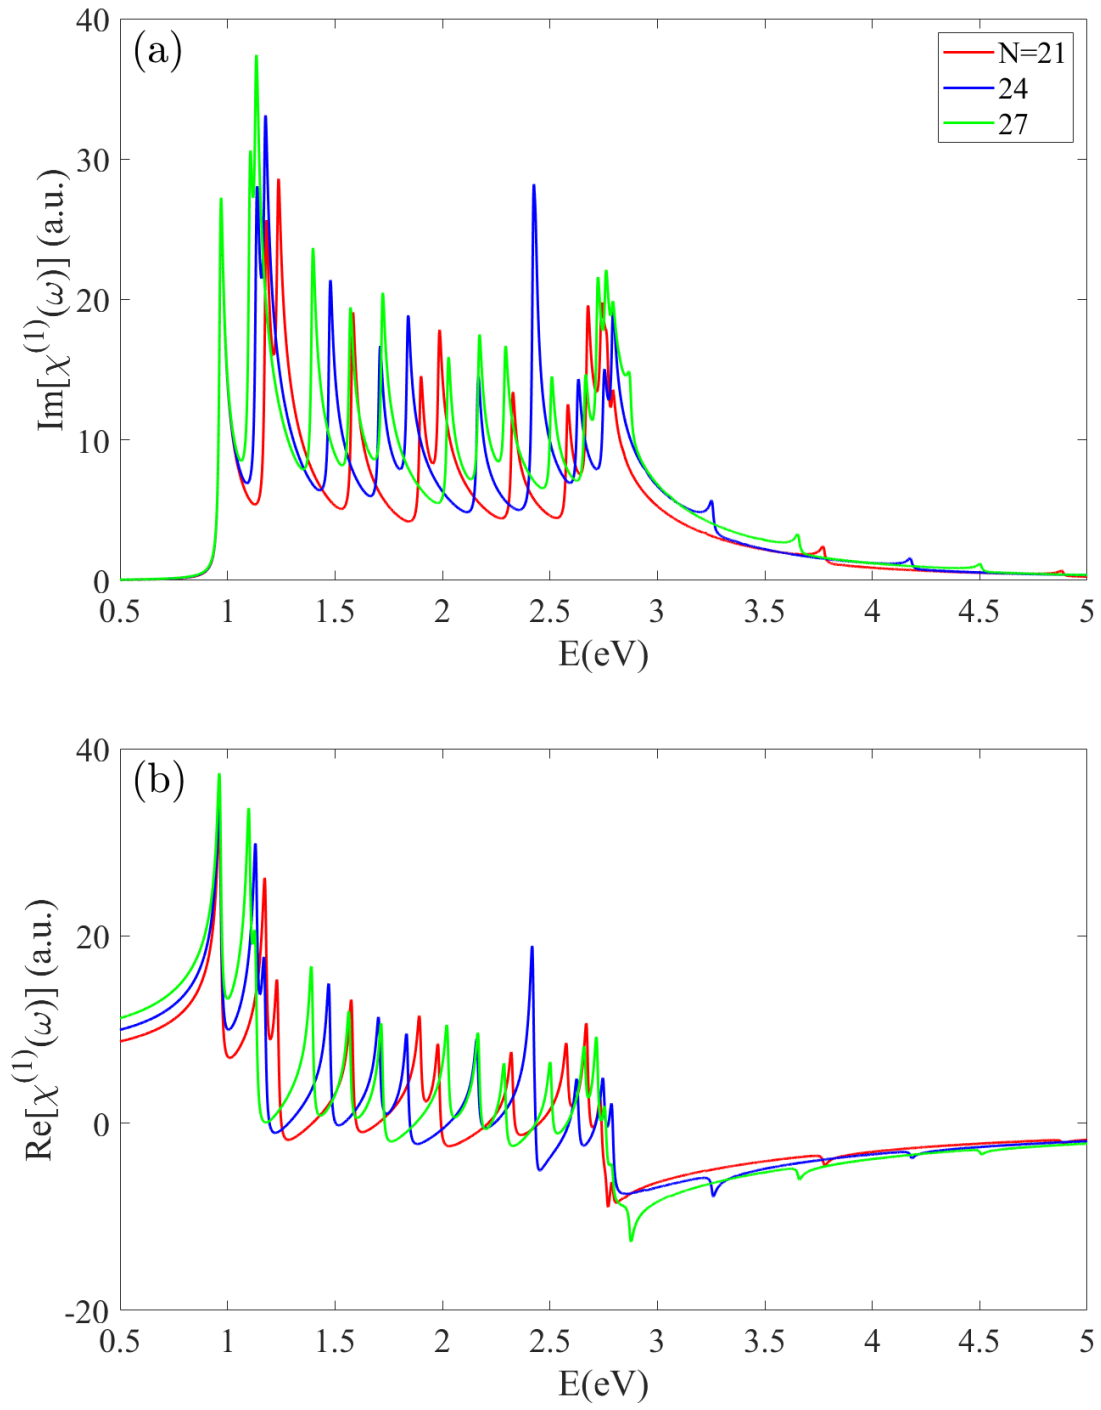

**Figure A5.** The (a) imaginary and (b) part of the linear optical susceptibility for zigzag BPNTs with S3 family.

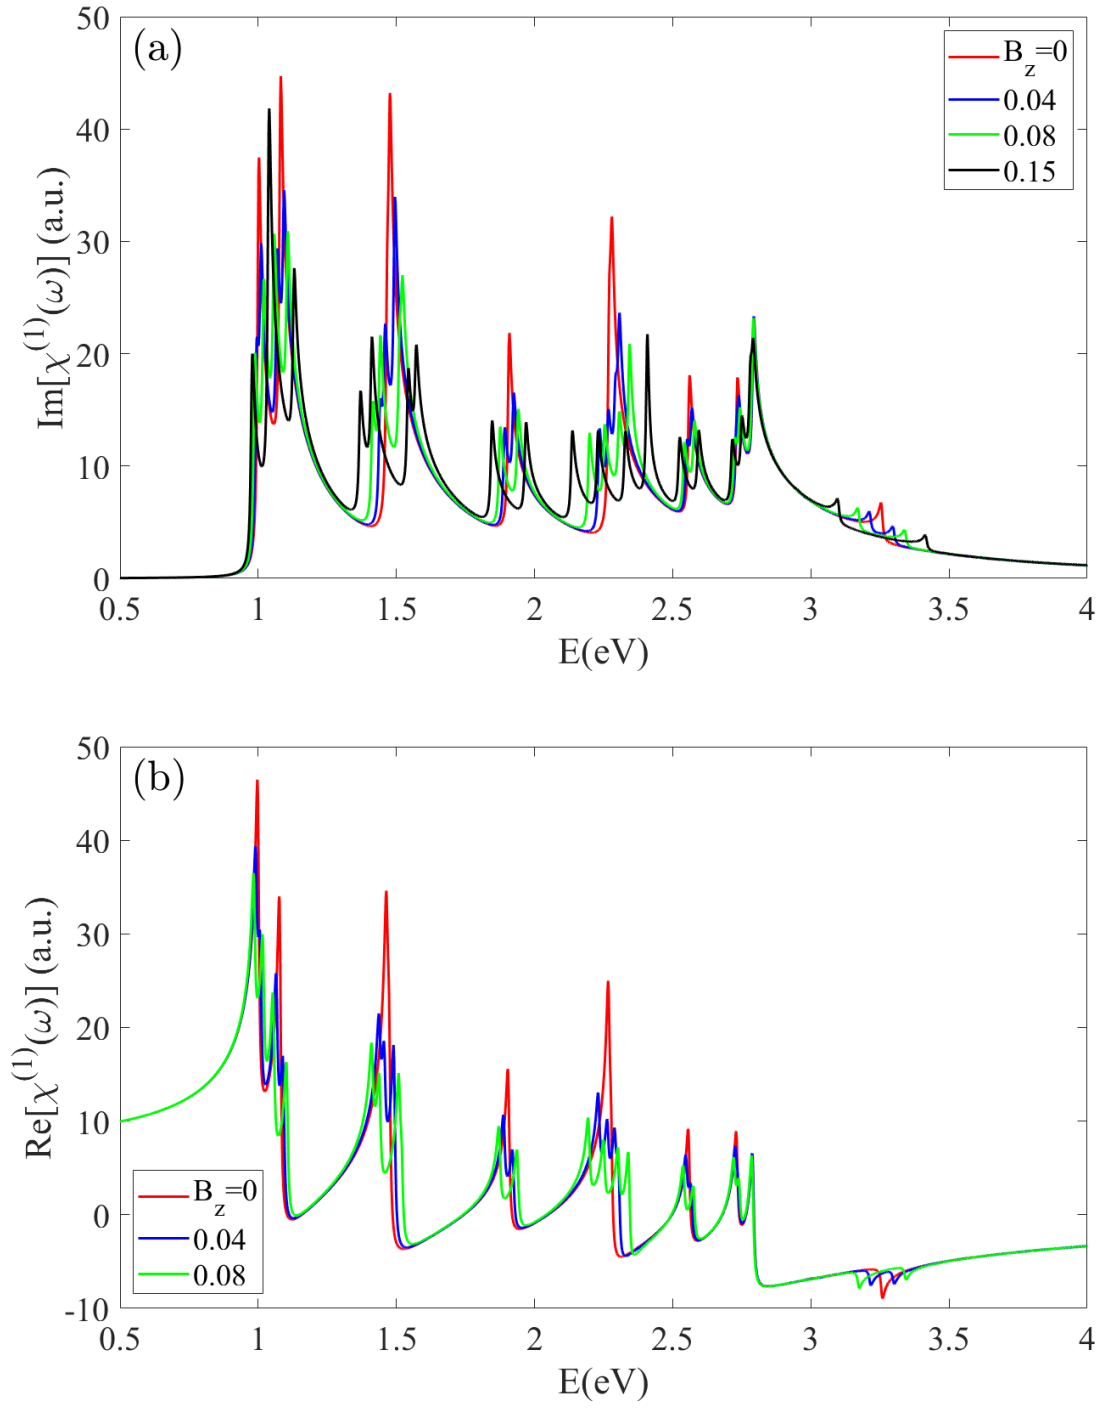

**Figure A6.** The (a) imaginary and (b) part of the linear optical susceptibility for Z20- BPNT, in the presence of the magnetic field.



- [1] J.M. Soler, E. Artacho, J.D. Gale, A. García, J. Junquera, P. Ordejón, D. Sánchez-Portal, The SIESTA method for ab initio order-N materials simulation, *Journal of Physics: Condensed Matter*, 14 (2002) 2745-2779.
- [2] H. Şahin, S. Cahangirov, M. Topsakal, E. Bekaroglu, E. Akturk, R.T. Senger, S. Ciraci, Monolayer honeycomb structures of group-IV elements and III-V binary compounds: First-principles calculations, *Physical Review B*, 80 (2009) 155453.
- [3] R. Saito, M. Fujita, G. Dresselhaus, M.S. Dresselhaus, Electronic structure of chiral graphene tubules, *Applied Physics Letters*, 60 (1992) 2204-2206.
- [4] R. Chegel, A. Zarifi, M. Rezvani Jalal, Chirality and magnetic field engineering of linear and quadratic electro-optic properties in Silicene nanotubes for advanced optoelectronic applications, *Physica B: Condensed Matter*, 694 (2024) 416435.
